# Supplementary material for: Combined visible spectroscopy–conductance–electrospray mass spectrometry studies of paramagnetic catalysts. Speciation of Jacobsen’s manganese salen complex † in the presence of σ-donor ligands, hydroxide sources, and cumyl hydroperoxide ‡
Source: Royal Society of Chemistry journal article supplement (doi:10.1039/b001059f), 2000-01-01
Supplement: b001059f.doc [file b001059f.doc]

Supplementary data for:

**Combined Visible Spectroscopy-Conductance-Electrospray Mass Spectrometry Studies of Paramagnetic Catalysts. Speciation of Jacobsen's Manganese Salen Complex[[1]](#footnote-2)† in the presence of -donor ligands, hydroxide sources, and cumyl hydroperoxide.**

John R. Chipperfielda*, John Clayton,a Siraj A. Khan,a and Simon Woodwardb*

a Department of Chemistry, University of Hull, Kingston-upon-Hull HU6 7RX, United Kingdom.

b School of Chemistry, Nottingham University, University Park, Nottingham NG7 2RD, United Kingdom.

1. **Derivation of the calculated absorbance and conductance values for formation of [J(L)2]Cl.**
2. **Derivation of the calculated absorbance and conductance values for formation of [J(L)]Cl.**
3. **(obs. - calc.)2 absorbance data for Equilibrium 2.**
4. **(obs. - calc.)2 conductance data for Equilibrium 2.**
5. **(obs. - calc.)2 absorbance data for Equilibrium 3.**
6. **(obs. - calc.)2 conductance data for Equilibrium 3.**

**7. Derivation of Equation (8).**

**8. Derivation of Equation (10).**

**1. Derivation of the calculated absorbance and conductance values for formation of [J(L)2]Cl.**

**Formation of [JL2+]Cl–**

For formation of a complex ion **[JL2]+** from **JCl** and L

*K*

**JCl** + 2L **[JL2]+** + Cl– (A1)

If the total amounts of Jacobsen’s catalyst and ligand are [**JT**] and [LT] respectively, mass balance gives

[**JT**] = [**JCl**] + [**JL2+**] (A2)

[LT] = [L] + 2[**JL2+**] (A3)

As charges must balance

[**JL2+**] = [Cl–] (A4)

Under the conditions of these experiments [LT] was always much larger than [**JT**] so eqn (A3) can be simplified to

[LT] = [L] (A5)

From eqn (A1) and eqn (A4)

*K* = (A6)

and from substituting for [L] and [**JCl**] from eqn (A2) and eqn (A3) we get

[**JL2+**] = (A7)

*Conductance*

The conductance, *S*L, is linearly proportional to the concentration of ions [**JL2**] **+**,

Thus

*S*L = *S*o + [**JL2+**]/*a* (A8)

where *S*o is the conductance of solution with no added L, and *a* is a constant.

When eqn (A7) is substituted into eqn (A8) we get

*S*L = *S*o + (A9)

With [**JT**] kept constant, a series of *S*L, [LT] pairs were used to get best-fit values for *K* and *a*.

*Absorbance*

If only **JCl** and **JL2+** absorb, and L does not absorb the absorbance, *A*L, is given by

*A*L = **J**[**JCl**] + **JL**[**JL2+**] (A10)

With no added ligand, the absorbance *A*ois given by

*A*o= **J**[**JT**] (A11)

If **JL**/**J** = , using eqn (A2) and eqn (A3) we can write

*A*L = *A*o{1 + (–1)[ **JL2+**]/[**JT**]} (A12)

Substituting for [**JL2+**] from eqn (A7) we get

*A*L = *A*o{1 + (–1)} (A13)

With [**JT**] kept constant, a series of *A*L, [LT] pairs were used to get best-fit values for *K* and **.

**2. Derivation of the calculated absorbance and conductance values for formation of [J(L)]Cl.**

**Formation of [JL+]Cl–**

For formation of a complex **JL+** from **JCl** and L

*K*

**JCl** + L  **JL+** + Cl– (A14)

If the total amounts of Jacobsen’s catalyst and ligand are [**JT**] and [LT] respectively, mass balance gives

[**JT**] = [**JCl**] + [**JL+**] (A15)

[LT] = [L] + [**JL+**] (A16)

As charges must balance

[**JL+**] = [Cl–] (A17)

Under the conditions of these experiments [LT] was always much larger than [**JT**] so eqn (A16) can be simplified to

[LT] = [L] (A18)

From eqn (A14) and eqn (A17)

*K* = (A19)

and from substituting for [L] and [**JCl**] from eqn (A15) and eqn (A16) we get

[**JL+**] = (A20)

*Conductance*

The conductance, *S*L, is linearly proportional to the concentration of ions [**JL+**],

Thus

*S*L = *S*o + [**JL+**]/*b* (A21)

where *S*o is the conductance of solution with no added L, and *b* is a constant.

When eqn (A20) is substituted into eqn (A21) we get

*S*L = *S*o + (A22)

With [**JT**] kept constant, a series of *S*L, [LT] pairs were used to get best-fit values for *K* and *b*.

*Absorbance*

If only **JCl** and **JL+** absorb, and L does not absorb the absorbance, *A*Lis given by

*A*L = **J**[**JCl**] + **JL**[**JL+**] (A23)

With no added ligand, the absorbance *A*ois given by

*A*o= **J**[**JT**] (A24)

If **JL**/**J** = , using eqn (A15) and eqn (A16) we can write

*A*L = *A*o{1 + (–1)[ **JL+**]/[ **JT**]} (A25)

Substituting for [**JL+**] from eqn (A20) we get

*A*L = *A*o{1 + (–1)} (A26)

With [**JT**] kept constant, a series of *A*L, [LT] pairs were used to get best-fit values for *K* and **.

**(obs. - calc.)2 absorbance data for Equilibrium 2**

**(obs. - calc.)2 conductance data for Equilibrium 2**

**(obs. - calc.)2 absorbance data for Equilibrium 3**

**(obs. - calc.)2 conductance data for Equilibrium 3**

**7. Derivation of Equation (8)**

For an equilibrium between **JOH** and **CHP**, equation (A27)

**JOH** + **CHP** **JOH.CHP** (A27)

if ["JOH"] is the concentration of added **JOH**, the concentration of the complex is given by equation (A28)

(A28)

When *k*2obs was calculated using equation (4) [*X*o] was set to the total concentration of **JCl**. To give the rate constant for the rate-limiting step, *k*2true, it should be set to the concentration of **JOH.CHP**. We thus can get equation A29.

*k*2obs[**JCltot**] = *k*2true [**JOH.CHP**] (A29)

This, when substituted for [**JOH.CHP**] from equation (A28) gives Equation (8).

**8. Derivation of Equation (10)**

**P** is the species [**J2(O)]+**; **P·CHP** is ([**J2(O)]+.CHP**).

For an equilibrium between product **P** and **CHP**, equation (A30)

**P** +  **CHP** **{P.CHP}** (A30)

the absorbance change on reaction is given by equations (A31) and (A32)

A = Aproducts - Areactancts (A31)

A = P[**P**] + AP.CHP[**P.CHP**] - ”JOH”[**"JOH"**]o (A32)

If the **Ptot** is the total amount of product, applying equilibrium (A30)

we get equations (A33) and (A34).

[**P**] = [**Ptot**]/(1 + *K*PP[**CHP**]) (A33)

[**{P.CHP}**] **=** [**Ptot**]*K*PP[**CHP**])/(1 + *K*PP[**CHP**]) (A34)

Two molecules of **“JOH”** are needed to form one molecule of product, giving equation (A35)

[**Ptot**] = [**"JOH"**]o/2. (A35)

Then substituting for [**P**] and [**{P.CHP}**] into equation (A34) we get Equation (10) where  = P.CHP/P.

1. † [(*R*,*R*)-(-)-*N*,*N'*-bis-(3,5-di-*tert*-butylsalicylidene)-1,2-cyclohexanediaminomanganese(III) chloride] [↑](#footnote-ref-2)
